# Supplementary material
Source: PubMed Central journal article supplement (PMC6504148)
Supplement: DS1_JVD_10.1177_1040638717732371.pdf [file DS1_JVD_10.1177_1040638717732371.pdf]

**Supplementary Table 1.** NVSL repository isolates.

| WGS section | BTYP no. | Date received (m/d/y) | Species | U.S. State | GDPT results | REA profile |
|-------------|----------|-----------------------|---------|------------|--------------|-------------|
| A1          | 10097    | 10/15/2014            | Chicken | IN         | 1            | 1006        |
| A1          | 6099     | 7/10/2000             | Turkey  | AR         | 1            | 1006        |
| A1          | 5736     | 9/27/1999             | Turkey  | IN         | 1            | 1006        |
| A1          | 9803     | 9/12/2012             | Turkey  | IN         | 1            | 0512        |
| A1          | 9603     | 8/19/2011             | Turkey  | IN         | 1            | 0513        |
| A1          | 9185     | 9/21/2009             | Chicken | VA         | 1            | 0519        |
| A1          | 9486     | 1/4/2011              | Turkey  | MO         | 1            | 1011        |
| A1          | 9367     | 8/12/2010             | Chicken | AL         | 1            | 1011        |
| A1          | 9577     | 6/13/2011             | Turkey  | VA         | 1            | 1044        |
| A1          | 9832     | 12/6/2012             | Chicken | IN         | 1            | 1006        |
| A1          | 9621     | 9/26/2011             | Turkey  | MN         | 1            | 1375        |
| A1          | 9460     | 11/12/2010            | Turkey  | NC         | 1            | 1419        |
| A1          | 9833     | 12/6/2012             | Chicken | CA         | 1            | 1488        |
| A1          | 10055    | 5/27/2014             | Turkey  | MN         | 15           | 1119        |
| A2          | 9678     | 2/17/2012             | Chicken | TX         | 1            | 1396        |
| A2          | 9632     | 10/28/2011            | Chicken | MS         | 1            | 1396        |
| A2          | 9612     | 9/14/2011             | Chicken | MS         | 1            | 1396        |
| A2          | 9491     | 1/10/2011             | Chicken | VA         | 1            | 0514        |
| A2          | 9488     | 1/10/2011             | Chicken | VA         | 1            | 0515        |
| A2          | 9063     | 2/18/2009             | Turkey  | WI         | 1            | 0520        |
| A2          | 9193     | 9/30/2009             | Turkey  | IN         | 1            | 1007        |
| A2          | 8963     | 8/6/2008              | Turkey  | CA         | 1            | 1014        |
| A2          | 9599     | 8/16/2011             | Chicken | AR         | 1            | 1266        |
| A2          | 9731     | 4/30/2012             | Chicken | VA         | 1            | 1320        |
| A2          | 9613     | 9/14/2011             | Chicken | MS         | 1            | 1460        |
| A2          | 9578     | 6/15/2011             | Turkey  | IL         | 1            | 1460        |
| A2          | 9523     | 3/14/2011             | Turkey  | OH         | 1            | 1464        |
| A2          | 9574     | 6/8/2011              | Turkey  | OH         | 1            | 1467        |
| A2          | 9818     | 10/18/2012            | Turkey  | IA         | 1            | 1485        |
| A2          | 10091    | 10/1/2014             | Turkey  | IA         | 1            | 1517        |
| A2          | 6827     | 4/18/2002             | Quail   | CA         | 3            | 1234        |
| A2          | 10165    | 3/20/2015             | Turkey  | MN         | 4            | 1521        |
| A2          | 9978     | 10/25/2013            | Turkey  | MN         | 6            | 1356        |
| A2          | 9672     | 2/9/2012              | Turkey  | MN         | 6            | 1015        |
| A2          | 9673     | 2/9/2012              | Turkey  | MN         | 6,8          | 1015        |
| A2          | 9674     | 2/9/2012              | Turkey  | MN         | 6,8,11       | 1015        |
| A2          | 9827     | 11/16/2012            | Turkey  | MN         | 11,14        | 1486        |
| A2          | 9847     | 12/26/2012            | Turkey  | MN         | 2,14         | 1486        |
| A2          | 10049    | 4/25/2014             | Turkey  | VA         | 11           | 0501        |
| A2          | 9866     | 2/15/2013             | Turkey  | MN         | 13           | 0510        |
| A2          | 6846     | 5/21/2002             | Turkey  | TX         | 1,12         | 1239        |

| WGS section | BTYP no. | Date received (m/d/y) | Species | U.S. State | GDPT results | REA profile |
|-------------|----------|-----------------------|---------|------------|--------------|-------------|
| A2          | 9076     | 3/13/2009             | Turkey  | CA         | 1,14         | 1435        |
| B1          | 9904     | 5/29/2013             | Unknown | MN         | 7            | 0007        |
| B1          | 9875     | 3/1/2013              | Chicken | CA         | 6,7          | 0006        |
| B2          | 9675     | 2/14/2012             | Chicken | CA         | 15           | 1122        |
| B2          | 9814     | 10/5/2012             | Unknown | CA         | 14,15        | 1122        |
| B2          | 9813     | 10/4/2012             | Unknown | CA         | 14,15        | 1122        |
| B2          | 10050    | 5/1/2014              | Chicken | CA         | 12,15        | 0003        |
| B2          | 5780     | 11/15/1999            | Turkey  | CA         | 3,4          | 1030        |
| B2          | 10100    | 10/28/2014            | Turkey  | CA         | 3,4,12       | 1030        |
| B3a         | 9958     | 9/9/2013              | Turkey  | VA         | 9            | 0508        |
| B3a         | 9941     | 8/5/2013              | Turkey  | IN         | 9            | 0509        |
| B3a         | 10045    | 4/24/2014             | Chicken | NC         | 9            | 1346        |
| B3a         | 10017    | 2/12/2014             | Turkey  | NC         | 9            | 1346        |
| B3a         | 9871     | 2/22/2013             | Turkey  | NC         | 9            | 1346        |
| B3a         | 9846     | 12/26/2012            | Turkey  | MN         | 11,14        | 1489        |
| B3b         | 9953     | 8/27/2013             | Chicken | MS         | 3            | TD045       |
| B3b         | 9895     | 4/19/2013             | Turkey  | MI         | 3            | TD045       |
| B3b         | 9889     | 4/11/2013             | Chicken | MS         | 3            | TD045       |
| B3b         | 9840     | 12/13/2012            | Turkey  | MO         | 3            | TD045       |
| B3b         | 9902     | 5/23/2013             | Chicken | MS         | 3,12         | TD045       |
| B3b         | 9976     | 10/16/2013            | Chicken | MS         | 3,4          | TD045       |
| B3b         | 9952     | 8/27/2013             | Chicken | MS         | 3,4          | TD045       |
| B3b         | 9890     | 4/11/2013             | Chicken | MS         | 3,4          | TD045       |
| B4a         | 10139    | 1/16/2015             | Turkey  | MO         | 3,4,12,14    | 0522        |
| B4a         | 10142    | 1/16/2015             | Turkey  | MO         | 4,12         | 0522        |
| B4a         | 10138    | 1/16/2015             | Turkey  | MO         | 4,12         | 0522        |
| B4a         | 10169    | 4/1/2015              | Turkey  | MN         | 4            | 0522        |
| B4a         | 10166    | 3/24/2015             | Turkey  | MN         | 4            | 0522        |
| B4a         | 6053     | 6/1/2000              | Chicken | AL         | 4            | 1023        |
| B4a         | 10053    | 5/6/2014              | Chicken | TX         | 11           | 1023        |
| B4a         | 9720     | 4/26/2012             | Chicken | GA         | 3,4,14       | 1023        |
| B4a         | 9718     | 4/26/2012             | Chicken | GA         | 3,4,14       | 1023        |
| B4a         | 9714     | 4/26/2012             | Chicken | GA         | 3,4,14       | 1023        |
| B4a         | 9721     | 4/26/2012             | Chicken | GA         | 4,14         | 1023        |
| B4a         | 9719     | 4/26/2012             | Chicken | GA         | 3,4          | 1023        |
| B4a         | 9717     | 4/26/2012             | Chicken | GA         | 3,4          | 1023        |
| B4a         | 9711     | 4/26/2012             | Chicken | GA         | 3,4          | 1023        |
| B4a         | 6055     | 6/1/2000              | Rabbit  | AL         | 3,4          | 1023        |
| B4a         | 5618     | 6/28/1999             | Chicken | TX         | 3,4          | 1023        |
| B4a         | 6054     | 6/1/2000              | Chicken | AL         | 3,4          | 1083        |
| B4a         | 6052     | 6/1/2000              | Chicken | AL         | 3,4          | 1083        |
| B4a         | 5864     | 2/4/2000              | Turkey  | KS         | 3,4          | 1083        |
| B4a         | 5505     | 3/4/1999              | Chicken | GA         | 3,4          | 1083        |

| WGS section | BTYP no. | Date received (m/d/y) | Species  | U.S. State | GDPT results | REA profile |
|-------------|----------|-----------------------|----------|------------|--------------|-------------|
| B4a         | 6757     | 3/5/2002              | Turkey   | MO         | 12           | 1185        |
| B4a         | 6514     | 8/10/2001             | Turkey   | MO         | 12           | 1185        |
| B4a         | 10151    | 2/11/2015             | Turkey   | MO         | 4,11         | 1185        |
| B4a         | 6756     | 3/5/2002              | Turkey   | MO         | 4,12         | 1185        |
| B4a         | 6630     | 11/13/2001            | Turkey   | MO         | Undetected   | 1185        |
| B4b         | 9198     | 10/13/2009            | Turkey   | VA         | 1            | 1164        |
| B4b         | 9102     | 5/7/2009              | Chicken  | MS         | 1            | 1165        |
| B4b         | 10088    | 9/30/2014             | Turkey   | MO         | 16           | 1515        |
| B4b         | 6114     | 7/14/2000             | Turkey   | CA         | 2,5,12       | 1100        |
| B4b         | 10033    | 3/19/2014             | Chicken  | MS         | 2,5,12       | 1217        |
| B4b         | 10086    | 9/19/2014             | Chicken  | MS         | 2,5          | 1217        |
| B4b         | 10002    | 1/9/2014              | Chicken  | MS         | 2,5          | 1281        |
| B4b         | 10042    | 4/15/2014             | Chicken  | MO         | 2,5          | 1510        |
| B5a         | 9821     | 11/1/2012             | Deer     | NY         | 1            | 0511        |
| B5a         | 9778     | 8/28/2012             | Chicken  | PA         | 1            | 0511        |
| B5a         | 9605     | 8/19/2011             | Turkey   | IN         | 1            | 1208        |
| B5a         | 9973     | 10/11/2013            | Turkey   | CA         | 12           | 1340        |
| B5a         | 9956     | 8/30/2013             | Turkey   | CA         | 12           | 1340        |
| B5a         | 9955     | 8/30/2013             | Turkey   | CA         | 12           | 1340        |
| B5a         | 9911     | 6/21/2013             | Deer     | NY         | Undetected   | 1398        |
| B5b         | 9670     | 2/8/2012              | Turkey   | CA         | 1            | 0001        |
| B5b         | 10046    | 4/24/2014             | Deer     | NY         | 1            | 0502        |
| B5c         | 9464     | 11/23/2010            | Turkey   | MN         | 1            | 0516        |
| B5c         | 9242     | 2/4/2010              | Turkey   | MN         | 1            | 0517        |
| B5c         | 9224     | 12/18/2009            | Chicken  | MS         | 1            | 0518        |
| B5c         | 9995     | 1/3/2014              | Feline   | WI         | 1            | 1120        |
| B5c         | 9237     | 1/21/2010             | Pheasant | MN         | 1            | 1448        |
| B5c         | 10027    | 2/21/2014             | Cattle   | MO         | 3            | 0503        |
| B5c         | 10026    | 2/21/2014             | Cattle   | MO         | 3            | 0504        |
| B5c         | 10025    | 2/21/2014             | Cattle   | MO         | 3            | 0505        |
| B5c         | 10023    | 2/21/2014             | Cattle   | MO         | 3            | 0507        |
| B5c         | 10065    | 8/5/2014              | Goose    | CA         | 3            | 1511        |
| B5c         | 9917     | 7/18/2013             | Unknown  | Chile      | 4            | 0806        |
| B5c         | 9458     | 11/12/2010            | Unknown  | Chile      | 4,7          | 0806        |
| B5c         | 9457     | 11/12/2010            | Unknown  | Chile      | 4,7          | 0806        |
| B5c         | 9455     | 11/12/2010            | Unknown  | Chile      | 4,7          | 0806        |
| B5c         | 6110     | 7/14/2000             | Turkey   | CA         | 3,4,7        | 1103        |
| B5c         | 10110    | 11/20/2014            | Turkey   | MI         | 3,4          | 1518        |
| B5c         | 10024    | 2/21/2014             | Cattle   | MO         | 3,4          | 0506        |
| B5c         | 10098    | 10/22/2014            | Swine    | SD         | 3,4          | 1057        |
| B5c         | 10066    | 8/7/2014              | Turkey   | NC         | 3,11         | 1057        |
| B5c         | 10081    | 9/10/2014             | Turkey   | MI         | 11           | 1057        |
| B5c         | 10067    | 8/7/2014              | Turkey   | NC         | 11           | 1512        |

| WGS section | BTYP no. | Date received<br>(m/d/y) | Species | U.S.<br>State | GDPT results | REA<br>profile |
|-------------|----------|--------------------------|---------|---------------|--------------|----------------|
| B5c         | 9903     | 5/29/2013                | Unknown | MN            | 12           | 0012           |
| B5c         | 9972     | 10/11/2013               | Turkey  | CA            | 12           | 1132           |

GDPT = gel diffusion precipitin test; REA = restriction endonuclease analysis; WGS = whole genome sequence.
