# Supplementary material
Source: PubMed Central journal article supplement (PMC6504148)
Supplement: DS2_JVD_10.1177_1040638717732371.pdf [file DS2_JVD_10.1177_1040638717732371.pdf]

Supplementary Table 2. kSNP assembly statistics.

|                  | read1.gz | read2.gz | ave alignment depth | alignment coverage | N50    | E-size | max    | percent reads kraken identified as pasteur* | contigs =>300 bases | total bases used in kSNP |
|------------------|----------|----------|---------------------|--------------------|--------|--------|--------|---------------------------------------------|---------------------|--------------------------|
| <b>BTYP1</b>     | 102M     | 112M     | 96.1249X            | 92.12%             | 31920  | 40116  | 107957 | 93.7785                                     | 152                 | 2,186,025                |
| <b>BTYP10002</b> | 153M     | 170M     | 153.982X            | 94.50%             | 43196  | 64150  | 191607 | 94.6808                                     | 109                 | 2,251,130                |
| <b>BTYP10017</b> | 38M      | 45M      | 43.0929X            | 92.50%             | 100516 | 105885 | 224826 | 97.2644                                     | 43                  | 2,196,699                |
| <b>BTYP10023</b> | 141M     | 157M     | 110.608X            | 85.92%             | 23210  | 31435  | 98148  | 82.5562                                     | 224                 | 2,169,502                |
| <b>BTYP10024</b> | 154M     | 166M     | 120.016X            | 92.02%             | 59825  | 71212  | 173757 | 79.0908                                     | 101                 | 2,347,810                |
| <b>BTYP10025</b> | 46M      | 55M      | 40.2656X            | 92.55%             | 72561  | 98350  | 290925 | 85.8133                                     | 109                 | 2,422,891                |
| <b>BTYP10026</b> | 49M      | 56M      | 50.8496X            | 91.87%             | 85979  | 91053  | 214372 | 95.0858                                     | 69                  | 2,362,703                |
| <b>BTYP10027</b> | 56M      | 64M      | 54.7131X            | 92.00%             | 107615 | 107032 | 197967 | 91.5675                                     | 75                  | 2,363,219                |
| <b>BTYP10033</b> | 140M     | 149M     | 141.651X            | 94.50%             | 78099  | 82833  | 167453 | 94.439                                      | 85                  | 2,267,237                |
| <b>BTYP10042</b> | 41M      | 49M      | 44.6207X            | 93.35%             | 89389  | 104297 | 199424 | 94.7373                                     | 56                  | 2,198,480                |
| <b>BTYP10045</b> | 69M      | 80M      | 79.0364X            | 92.42%             | 111737 | 130474 | 242152 | 97.4715                                     | 41                  | 2,203,644                |
| <b>BTYP10046</b> | 104M     | 115M     | 104.702X            | 92.79%             | 56607  | 76726  | 202884 | 96.1423                                     | 83                  | 2,254,424                |
| <b>BTYP10049</b> | 142M     | 166M     | 136.948X            | 91.30%             | 61580  | 63387  | 176937 | 92.3022                                     | 113                 | 2,168,848                |
| <b>BTYP10050</b> | 50M      | 57M      | 60.1239X            | 99.68%             | 98156  | 112247 | 209451 | 95.7688                                     | 61                  | 2,287,848                |
| <b>BTYP10053</b> | 81M      | 96M      | 93.8806X            | 94.56%             | 74768  | 80087  | 179226 | 96.1939                                     | 71                  | 2,213,866                |
| <b>BTYP10055</b> | 152M     | 175M     | 148.526X            | 90.86%             | 32753  | 62656  | 252956 | 93.9311                                     | 132                 | 2,166,541                |
| <b>BTYP10065</b> | 87M      | 95M      | 43.167X             | 92.37%             | 97764  | 134361 | 384212 | 43.6798                                     | 52                  | 2,244,511                |
| <b>BTYP10066</b> | 183M     | 201M     | 131.26X             | 91.75%             | 34439  | 41673  | 116374 | 80.4714                                     | 138                 | 2,215,090                |
| <b>BTYP10067</b> | 84M      | 97M      | 89.7066X            | 91.98%             | 104776 | 130235 | 296781 | 96.3097                                     | 70                  | 2,325,841                |
| <b>BTYP10081</b> | 206M     | 233M     | 162.889X            | 91.64%             | 22757  | 27530  | 82664  | 86.2154                                     | 207                 | 2,198,060                |
| <b>BTYP10086</b> | 167M     | 186M     | 154.877X            | 94.50%             | 48824  | 60059  | 157434 | 90.2635                                     | 116                 | 2,252,231                |
| <b>BTYP10088</b> | 218M     | 238M     | 202.434X            | 93.79%             | 42111  | 45498  | 86418  | 92.4606                                     | 122                 | 2,204,947                |
| <b>BTYP10091</b> | 111M     | 119M     | 88.9055X            | 92.86%             | 10245  | 12812  | 51837  | 90.9734                                     | 392                 | 2,144,627                |
| <b>BTYP10097</b> | 102M     | 110M     | 82.8307X            | 91.46%             | 11007  | 14527  | 49567  | 94.1835                                     | 364                 | 2,158,433                |

|                  | read1.gz | read2.gz | ave<br>alignment<br>depth | alignment<br>coverage | N50   | E-size | max    | percent reads<br>kraken<br>identified as<br>pasteur* | contigs<br>=>300<br>bases | total bases<br>used in kSNP |
|------------------|----------|----------|---------------------------|-----------------------|-------|--------|--------|------------------------------------------------------|---------------------------|-----------------------------|
| <b>BTYP10098</b> | 146M     | 164M     | 106.775X                  | 91.68%                | 55996 | 57793  | 131573 | 76.3706                                              | 105                       | 2,219,163                   |
| <b>BTYP10100</b> | 88M      | 92M      | 75.3482X                  | 98.98%                | 14738 | 17590  | 59356  | 94.4995                                              | 306                       | 2,194,923                   |
| <b>BTYP10110</b> | 125M     | 135M     | 105.299X                  | 92.53%                | 20377 | 23276  | 68476  | 97.4746                                              | 223                       | 2,208,095                   |
| <b>BTYP10138</b> | 94M      | 97M      | 78.5653X                  | 93.59%                | 9348  | 11153  | 39673  | 94.6274                                              | 397                       | 2,139,467                   |
| <b>BTYP10139</b> | 109M     | 117M     | 89.9255X                  | 93.77%                | 7833  | 11420  | 52943  | 94.4772                                              | 460                       | 2,127,009                   |
| <b>BTYP10142</b> | 107M     | 117M     | 87.7025X                  | 93.73%                | 7724  | 9508   | 37211  | 93.5132                                              | 463                       | 2,123,857                   |
| <b>BTYP10151</b> | 135M     | 143M     | 112.941X                  | 93.88%                | 11191 | 14365  | 61587  | 95.8376                                              | 359                       | 2,158,225                   |
| <b>BTYP10165</b> | 110M     | 116M     | 89.7212X                  | 91.51%                | 9015  | 11072  | 47580  | 92.7707                                              | 467                       | 2,095,938                   |
| <b>BTYP10166</b> | 106M     | 112M     | 87.1416X                  | 93.71%                | 9143  | 10937  | 33808  | 92.8135                                              | 429                       | 2,120,420                   |
| <b>BTYP10169</b> | 86M      | 89M      | 72.5285X                  | 93.73%                | 14869 | 20227  | 81831  | 94.6659                                              | 297                       | 2,158,199                   |
| <b>BTYP3-1</b>   | 135M     | 150M     | 131.881X                  | 92.15%                | 38972 | 55148  | 192439 | 94.1049                                              | 113                       | 2,192,213                   |
| <b>BTYP3-2</b>   | 167M     | 177M     | 160.862X                  | 92.06%                | 47417 | 54942  | 141529 | 94.0015                                              | 114                       | 2,194,764                   |
| <b>BTYP3-3</b>   | 121M     | 135M     | 117.869X                  | 92.07%                | 29954 | 45291  | 110722 | 93.9803                                              | 145                       | 2,188,181                   |
| <b>BTYP4</b>     | 111M     | 115M     | 106.16X                   | 92.07%                | 49942 | 50008  | 108763 | 94.1102                                              | 110                       | 2,200,322                   |
| <b>BTYP5</b>     | 117M     | 132M     | 113.121X                  | 92.01%                | 30058 | 48361  | 197294 | 94.3887                                              | 137                       | 2,191,590                   |
| <b>BTYP5505</b>  | 106M     | 115M     | 87.5311X                  | 94.27%                | 15033 | 20470  | 83236  | 94.2858                                              | 256                       | 2,177,494                   |
| <b>BTYP5618</b>  | 111M     | 120M     | 96.2935X                  | 94.45%                | 17690 | 23944  | 79688  | 96.0334                                              | 234                       | 2,180,103                   |
| <b>BTYP5736</b>  | 99M      | 106M     | 78.9535X                  | 91.28%                | 15015 | 21188  | 63896  | 92.5357                                              | 271                       | 2,199,932                   |
| <b>BTYP5780</b>  | 100M     | 109M     | 78.4123X                  | 99.16%                | 14045 | 16245  | 53752  | 84.9076                                              | 313                       | 2,230,923                   |
| <b>BTYP5864</b>  | 87M      | 91M      | 69.7886X                  | 94.18%                | 26223 | 32408  | 85767  | 90.5362                                              | 181                       | 2,202,788                   |
| <b>BTYP6</b>     | 135M     | 156M     | 131.503X                  | 92.27%                | 45621 | 51635  | 108717 | 93.9526                                              | 128                       | 2,196,718                   |
| <b>BTYP6052</b>  | 103M     | 111M     | 89.5052X                  | 94.30%                | 34871 | 38961  | 108205 | 95.5793                                              | 146                       | 2,200,237                   |
| <b>BTYP6053</b>  | 137M     | 147M     | 117.112X                  | 94.66%                | 21198 | 28807  | 117254 | 94.541                                               | 213                       | 2,200,906                   |
| <b>BTYP6054</b>  | 113M     | 121M     | 98.2781X                  | 94.37%                | 12338 | 16646  | 59919  | 96.3165                                              | 307                       | 2,162,104                   |
| <b>BTYP6055</b>  | 121M     | 132M     | 101.699X                  | 94.68%                | 11373 | 14217  | 60428  | 94.7861                                              | 343                       | 2,174,659                   |

|                 | read1.gz | read2.gz | ave<br>alignment<br>depth | alignment<br>coverage | N50    | E-size | max    | percent reads<br>kraken<br>identified as<br>pasteur* | contigs<br>=>300<br>bases | total bases<br>used in kSNP |
|-----------------|----------|----------|---------------------------|-----------------------|--------|--------|--------|------------------------------------------------------|---------------------------|-----------------------------|
| <b>BTYP6099</b> | 142M     | 153M     | 112.11X                   | 91.36%                | 15014  | 20058  | 78976  | 92.4031                                              | 291                       | 2,190,674                   |
| <b>BTYP6110</b> | 142M     | 151M     | 115.884X                  | 92.52%                | 14149  | 21170  | 97037  | 95.1663                                              | 297                       | 2,197,712                   |
| <b>BTYP6114</b> | 121M     | 131M     | 84.9223X                  | 94.06%                | 14077  | 18022  | 65773  | 85.3686                                              | 280                       | 2,164,243                   |
| <b>BTYP6514</b> | 143M     | 149M     | 121.387X                  | 94.01%                | 25642  | 35264  | 91534  | 96.4023                                              | 183                       | 2,207,449                   |
| <b>BTYP6630</b> | 88M      | 95M      | 74.9228X                  | 94.04%                | 25743  | 33103  | 95384  | 96.1385                                              | 198                       | 2,195,865                   |
| <b>BTYP6756</b> | 88M      | 91M      | 74.4264X                  | 93.87%                | 11525  | 14749  | 47743  | 96.2642                                              | 348                       | 2,163,139                   |
| <b>BTYP6757</b> | 99M      | 105M     | 83.6491X                  | 94.06%                | 9808   | 12955  | 58025  | 96.0806                                              | 396                       | 2,155,996                   |
| <b>BTYP6827</b> | 114M     | 125M     | 80.5255X                  | 91.54%                | 9444   | 13283  | 63845  | 81.6554                                              | 419                       | 2,109,136                   |
| <b>BTYP6846</b> | 114M     | 123M     | 91.8703X                  | 92.09%                | 9833   | 12335  | 45022  | 91.4711                                              | 406                       | 2,124,901                   |
| <b>BTYP7</b>    | 132M     | 139M     | 126.863X                  | 92.00%                | 40021  | 51494  | 128699 | 93.9019                                              | 122                       | 2,192,022                   |
| <b>BTYP8963</b> | 268M     | 294M     | 222.372X                  | 91.39%                | 98638  | 107195 | 238111 | 92.5429                                              | 86                        | 2,203,980                   |
| <b>BTYP9063</b> | 279M     | 326M     | 232.311X                  | 90.76%                | 88442  | 90386  | 201473 | 94.1749                                              | 80                        | 2,174,096                   |
| <b>BTYP9076</b> | 250M     | 291M     | 205.952X                  | 91.78%                | 79037  | 81113  | 173488 | 94.3605                                              | 87                        | 2,169,101                   |
| <b>BTYP9086</b> | 246M     | 284M     | 192.775X                  | 93.61%                | 65829  | 75771  | 164434 | 89.4462                                              | 92                        | 2,329,247                   |
| <b>BTYP9102</b> | 273M     | 329M     | 235.897X                  | 92.63%                | 86346  | 111821 | 205539 | 96.4366                                              | 54                        | 2,203,996                   |
| <b>BTYP9185</b> | 81M      | 73M      | 63.2447X                  | 91.72%                | 65671  | 97307  | 310385 | 93.3806                                              | 92                        | 2,204,045                   |
| <b>BTYP9193</b> | 252M     | 264M     | 199.613X                  | 90.57%                | 104829 | 103841 | 201621 | 87.6228                                              | 69                        | 2,168,331                   |
| <b>BTYP9198</b> | 218M     | 244M     | 196.403X                  | 92.49%                | 155112 | 153477 | 335323 | 97.3116                                              | 45                        | 2,193,742                   |
| <b>BTYP9224</b> | 262M     | 283M     | 215.398X                  | 91.60%                | 149212 | 132577 | 203936 | 91.3507                                              | 42                        | 2,213,086                   |
| <b>BTYP9237</b> | 166M     | 152M     | 124.453X                  | 91.50%                | 93976  | 88807  | 180107 | 88.3013                                              | 54                        | 2,252,230                   |
| <b>BTYP9242</b> | 291M     | 300M     | 246.907X                  | 92.03%                | 119823 | 137053 | 292336 | 97.468                                               | 46                        | 2,209,847                   |
| <b>BTYP9367</b> | 258M     | 313M     | 218.691X                  | 90.91%                | 78521  | 115996 | 310735 | 94.1596                                              | 63                        | 2,175,870                   |
| <b>BTYP9455</b> | 130M     | 140M     | 128.787X                  | 92.69%                | 46228  | 57529  | 172947 | 97.7887                                              | 118                       | 2,255,063                   |
| <b>BTYP9457</b> | 117M     | 129M     | 116.225X                  | 92.71%                | 43026  | 53209  | 106252 | 97.5436                                              | 117                       | 2,237,763                   |
| <b>BTYP9458</b> | 165M     | 179M     | 164.003X                  | 92.66%                | 34639  | 50329  | 142720 | 97.8138                                              | 118                       | 2,235,005                   |

|                 | read1.gz | read2.gz | ave<br>alignment<br>depth | alignment<br>coverage | N50    | E-size | max    | percent reads<br>kraken<br>identified as<br>pasteur* | contigs<br>=>300<br>bases | total bases<br>used in kSNP |
|-----------------|----------|----------|---------------------------|-----------------------|--------|--------|--------|------------------------------------------------------|---------------------------|-----------------------------|
| <b>BTYP9460</b> | 240M     | 277M     | 205.523X                  | 91.75%                | 74053  | 98911  | 258820 | 94.2245                                              | 71                        | 2,261,032                   |
| <b>BTYP9464</b> | 210M     | 234M     | 184.17X                   | 91.79%                | 85082  | 86696  | 197375 | 95.5371                                              | 61                        | 2,223,239                   |
| <b>BTYP9486</b> | 273M     | 321M     | 221.252X                  | 91.12%                | 65682  | 106573 | 310134 | 92.9351                                              | 94                        | 2,199,022                   |
| <b>BTYP9488</b> | 239M     | 270M     | 201.77X                   | 91.25%                | 75156  | 75748  | 148619 | 93.7977                                              | 88                        | 2,170,724                   |
| <b>BTYP9491</b> | 253M     | 280M     | 212.495X                  | 92.48%                | 72029  | 78021  | 173434 | 92.2809                                              | 104                       | 2,216,396                   |
| <b>BTYP9523</b> | 256M     | 295M     | 212.88X                   | 90.52%                | 65730  | 82581  | 201611 | 91.2333                                              | 85                        | 2,176,620                   |
| <b>BTYP9574</b> | 286M     | 330M     | 231.694X                  | 90.71%                | 60757  | 82301  | 201585 | 90.2203                                              | 89                        | 2,180,689                   |
| <b>BTYP9577</b> | 216M     | 248M     | 177.469X                  | 91.81%                | 52321  | 91219  | 315356 | 92.7636                                              | 89                        | 2,250,223                   |
| <b>BTYP9578</b> | 215M     | 246M     | 188.788X                  | 92.24%                | 72266  | 73732  | 147472 | 93.1053                                              | 94                        | 2,199,835                   |
| <b>BTYP9599</b> | 221M     | 239M     | 194.979X                  | 90.72%                | 67398  | 82216  | 184060 | 94.847                                               | 75                        | 2,173,325                   |
| <b>BTYP9603</b> | 188M     | 213M     | 167.489X                  | 91.13%                | 65691  | 106622 | 316168 | 94.9237                                              | 79                        | 2,236,358                   |
| <b>BTYP9605</b> | 345M     | 361M     | 276.096X                  | 91.02%                | 87910  | 122643 | 334224 | 91.377                                               | 66                        | 2,246,760                   |
| <b>BTYP9612</b> | 175M     | 184M     | 148.436X                  | 91.31%                | 60144  | 62098  | 162843 | 93.1336                                              | 106                       | 2,185,069                   |
| <b>BTYP9613</b> | 237M     | 259M     | 205.798X                  | 92.29%                | 58630  | 68464  | 173410 | 92.214                                               | 110                       | 2,222,104                   |
| <b>BTYP9621</b> | 208M     | 226M     | 177.275X                  | 91.17%                | 69551  | 96381  | 229931 | 92.9129                                              | 77                        | 2,250,054                   |
| <b>BTYP9632</b> | 205M     | 226M     | 176.243X                  | 91.17%                | 56442  | 71778  | 184018 | 92.7809                                              | 84                        | 2,186,369                   |
| <b>BTYP9670</b> | 186M     | 202M     | 160.131X                  | 91.98%                | 87393  | 93483  | 202889 | 97.0515                                              | 52                        | 2,215,495                   |
| <b>BTYP9672</b> | 142M     | 164M     | 134.021X                  | 90.35%                | 26402  | 32479  | 95408  | 93.5851                                              | 175                       | 2,130,690                   |
| <b>BTYP9673</b> | 62M      | 74M      | 46.5063X                  | 90.39%                | 51962  | 68422  | 194816 | 77.2408                                              | 72                        | 2,162,521                   |
| <b>BTYP9674</b> | 138M     | 145M     | 128.093X                  | 90.34%                | 34949  | 44524  | 108521 | 90.7032                                              | 124                       | 2,140,078                   |
| <b>BTYP9675</b> | 131M     | 141M     | 137.264X                  | 99.67%                | 56625  | 66181  | 191934 | 95.4926                                              | 113                       | 2,267,741                   |
| <b>BTYP9678</b> | 231M     | 247M     | 191.59X                   | 91.22%                | 113660 | 104188 | 190071 | 93.4682                                              | 68                        | 2,194,950                   |
| <b>BTYP9711</b> | 130M     | 141M     | 133.281X                  | 94.50%                | 56206  | 53900  | 124349 | 96.4123                                              | 92                        | 2,206,285                   |
| <b>BTYP9714</b> | 125M     | 130M     | 126.71X                   | 94.44%                | 55565  | 62550  | 140651 | 96.2059                                              | 81                        | 2,211,295                   |
| <b>BTYP9717</b> | 40M      | 45M      | 44.3002X                  | 94.44%                | 79773  | 96157  | 174735 | 96.0808                                              | 46                        | 2,231,877                   |

|                 | read1.gz | read2.gz | ave<br>alignment<br>depth | alignment<br>coverage | N50    | E-size | max    | percent reads<br>kraken<br>identified as<br>pasteur* | contigs<br>=>300<br>bases | total bases<br>used in kSNP |
|-----------------|----------|----------|---------------------------|-----------------------|--------|--------|--------|------------------------------------------------------|---------------------------|-----------------------------|
| <b>BTYP9718</b> | 136M     | 161M     | 137.59X                   | 94.47%                | 28596  | 31855  | 95412  | 95.759                                               | 171                       | 2,189,936                   |
| <b>BTYP9719</b> | 136M     | 151M     | 135.83X                   | 94.49%                | 29851  | 32196  | 81834  | 95.4413                                              | 167                       | 2,191,225                   |
| <b>BTYP9720</b> | 139M     | 155M     | 139.466X                  | 94.53%                | 28027  | 35921  | 111813 | 95.8053                                              | 154                       | 2,196,888                   |
| <b>BTYP9721</b> | 148M     | 171M     | 143.84X                   | 94.45%                | 18694  | 25145  | 85901  | 95.7414                                              | 207                       | 2,185,085                   |
| <b>BTYP9731</b> | 108M     | 106M     | 85.6945X                  | 91.92%                | 75987  | 71749  | 147379 | 93.337                                               | 99                        | 2,172,546                   |
| <b>BTYP9778</b> | 219M     | 260M     | 196.173X                  | 92.39%                | 69138  | 80523  | 196842 | 94.7367                                              | 71                        | 2,204,781                   |
| <b>BTYP9803</b> | 195M     | 213M     | 154.082X                  | 91.40%                | 78572  | 74837  | 134109 | 92.9769                                              | 77                        | 2,244,515                   |
| <b>BTYP9813</b> | 130M     | 141M     | 134.765X                  | 99.70%                | 31661  | 36785  | 91425  | 95.2571                                              | 151                       | 2,252,514                   |
| <b>BTYP9814</b> | 108M     | 117M     | 112.673X                  | 99.67%                | 35647  | 44458  | 108857 | 95.7094                                              | 152                       | 2,250,549                   |
| <b>BTYP9818</b> | 177M     | 202M     | 152.426X                  | 90.26%                | 60330  | 73748  | 201496 | 89.7441                                              | 82                        | 2,152,056                   |
| <b>BTYP9821</b> | 119M     | 130M     | 114.186X                  | 92.00%                | 49829  | 67415  | 186284 | 91.0836                                              | 110                       | 2,183,170                   |
| <b>BTYP9827</b> | 115M     | 125M     | 109.289X                  | 90.94%                | 25282  | 29997  | 86842  | 92.1167                                              | 177                       | 2,153,848                   |
| <b>BTYP9832</b> | 217M     | 260M     | 189.26X                   | 91.35%                | 65766  | 89639  | 229766 | 94.6281                                              | 78                        | 2,234,680                   |
| <b>BTYP9833</b> | 223M     | 259M     | 196.906X                  | 89.75%                | 64225  | 92387  | 309343 | 93.8889                                              | 84                        | 2,138,865                   |
| <b>BTYP9840</b> | 192M     | 203M     | 172.132X                  | 93.57%                | 60677  | 83446  | 203263 | 97.3902                                              | 80                        | 2,199,682                   |
| <b>BTYP9846</b> | 28M      | 33M      | 31.0393X                  | 93.36%                | 108736 | 113021 | 243225 | 98.2644                                              | 53                        | 2,241,742                   |
| <b>BTYP9847</b> | 122M     | 129M     | 112.59X                   | 90.80%                | 17112  | 20029  | 61879  | 90.3793                                              | 258                       | 2,128,095                   |
| <b>BTYP9866</b> | 50M      | 58M      | 52.8947X                  | 89.74%                | 127462 | 118412 | 267147 | 93.6064                                              | 54                        | 2,187,703                   |
| <b>BTYP9871</b> | 148M     | 159M     | 146.261X                  | 92.44%                | 22125  | 28297  | 77193  | 96.5919                                              | 170                       | 2,150,816                   |
| <b>BTYP9875</b> | 149M     | 161M     | 145.268X                  | 90.93%                | 24955  | 29448  | 87479  | 96.1643                                              | 180                       | 2,144,619                   |
| <b>BTYP9889</b> | 122M     | 135M     | 120.324X                  | 93.47%                | 18939  | 25204  | 98987  | 96.7166                                              | 218                       | 2,167,945                   |
| <b>BTYP9890</b> | 149M     | 175M     | 147.742X                  | 93.44%                | 18410  | 20801  | 60576  | 96.5815                                              | 229                       | 2,170,372                   |
| <b>BTYP9895</b> | 135M     | 151M     | 137.143X                  | 93.45%                | 20226  | 27665  | 83824  | 96.7258                                              | 183                       | 2,172,214                   |
| <b>BTYP9902</b> | 125M     | 143M     | 127.701X                  | 93.43%                | 38039  | 44069  | 108734 | 97.258                                               | 127                       | 2,185,404                   |
| <b>BTYP9903</b> | 32M      | 38M      | 33.867X                   | 91.49%                | 175391 | 252313 | 616491 | 99.3708                                              | 27                        | 2,341,338                   |

|                   | read1.gz | read2.gz | ave<br>alignment<br>depth | alignment<br>coverage | N50    | E-size | max    | percent reads<br>kraken<br>identified as<br>pasteur* | contigs<br>=>300<br>bases | total bases<br>used in kSNP |
|-------------------|----------|----------|---------------------------|-----------------------|--------|--------|--------|------------------------------------------------------|---------------------------|-----------------------------|
| <b>BTYP9904</b>   | 164M     | 178M     | 164.41X                   | 90.98%                | 40469  | 41974  | 87202  | 96.8608                                              | 123                       | 2,159,188                   |
| <b>BTYP9911</b>   | 148M     | 163M     | 138.024X                  | 92.28%                | 56358  | 61045  | 110432 | 89.8465                                              | 100                       | 2,199,294                   |
| <b>BTYP9917</b>   | 183M     | 204M     | 184.398X                  | 92.44%                | 102313 | 146059 | 397712 | 99.8647                                              | 45                        | 2,243,554                   |
| <b>BTYP9941</b>   | 31M      | 38M      | 32.6295X                  | 92.77%                | 79909  | 95074  | 225906 | 93.8187                                              | 57                        | 2,192,054                   |
| <b>BTYP9952</b>   | 195M     | 215M     | 186.981X                  | 93.42%                | 61094  | 75463  | 199528 | 97.2154                                              | 77                        | 2,203,366                   |
| <b>BTYP9953</b>   | 168M     | 195M     | 169.502X                  | 93.43%                | 48962  | 60230  | 203255 | 97.2102                                              | 91                        | 2,196,786                   |
| <b>BTYP9955</b>   | 214M     | 237M     | 187.748X                  | 93.70%                | 50080  | 53902  | 126776 | 83.9061                                              | 99                        | 2,224,551                   |
| <b>BTYP9956</b>   | 38M      | 44M      | 25.5756X                  | 93.68%                | 76967  | 83417  | 164421 | 73.6696                                              | 62                        | 2,225,970                   |
| <b>BTYP9958</b>   | 43M      | 49M      | 47.1967X                  | 92.69%                | 165929 | 130872 | 207388 | 96.8062                                              | 38                        | 2,215,676                   |
| <b>BTYP9959</b>   | 199M     | 222M     | 32.9682X                  | 44.35%                | 1443   | 2371   | 14153  | 10.4832                                              | 559                       | 507,927                     |
| <b>BTYP9972</b>   | 197M     | 212M     | 191.398X                  | 91.77%                | 58979  | 75986  | 203855 | 97.1407                                              | 81                        | 2,214,705                   |
| <b>BTYP9973</b>   | 139M     | 159M     | 112.581X                  | 93.69%                | 49870  | 55111  | 126788 | 78.342                                               | 105                       | 2,222,962                   |
| <b>BTYP9976</b>   | 132M     | 139M     | 136.002X                  | 93.45%                | 64966  | 82850  | 199573 | 97.4585                                              | 74                        | 2,201,453                   |
| <b>BTYP9978</b>   | 47M      | 55M      | 50.9777X                  | 90.31%                | 104354 | 99236  | 218108 | 93.7446                                              | 59                        | 2,169,707                   |
| <b>BTYP9981</b>   | 124M     | 140M     | 124.601X                  | 93.10%                | 39382  | 51420  | 155321 | 93.2953                                              | 101                       | 2,187,723                   |
| <b>BTYP9995</b>   | 179M     | 191M     | 186.284X                  | 91.36%                | 74914  | 76354  | 139385 | 99.1823                                              | 66                        | 2,176,566                   |
| <b>BTYPL3</b>     | 126M     | 137M     | 121.388X                  | 92.11%                | 35049  | 43816  | 146548 | 93.478                                               | 151                       | 2,187,262                   |
| <b>BTYPLiver1</b> | 123M     | 141M     | 121.105X                  | 92.16%                | 23310  | 30735  | 74290  | 95.8323                                              | 167                       | 2,132,663                   |
| <b>BTYPLiver2</b> | 114M     | 125M     | 113.954X                  | 92.15%                | 35938  | 47358  | 112576 | 96.0597                                              | 121                       | 2,144,120                   |
| <b>BTYPLiver3</b> | 135M     | 143M     | 136.238X                  | 92.24%                | 78043  | 80187  | 210625 | 96.071                                               | 70                        | 2,154,239                   |
| <b>BTYPLiver4</b> | 127M     | 136M     | 126.954X                  | 92.12%                | 45148  | 51455  | 103827 | 96.1516                                              | 91                        | 2,150,617                   |
| <b>BTYPLR1</b>    | 131M     | 146M     | 123.299X                  | 92.12%                | 25002  | 30048  | 91384  | 93.644                                               | 186                       | 2,176,314                   |
| <b>BTYPM-1404</b> | 137M     | 150M     | 123.343X                  | 91.35%                | 31812  | 51600  | 202834 | 87.5098                                              | 118                       | 2,168,500                   |
| <b>BTYPMV3</b>    | 134M     | 140M     | 126.909X                  | 92.00%                | 26500  | 31632  | 83376  | 93.2318                                              | 175                       | 2,174,936                   |
| <b>BTYPMV4</b>    | 129M     | 144M     | 123.615X                  | 92.02%                | 25487  | 32690  | 87569  | 93.4869                                              | 188                       | 2,175,327                   |

|                     | read1.gz | read2.gz | ave<br>alignment<br>depth | alignment<br>coverage | N50   | E-size | max    | percent reads<br>kraken<br>identified as<br>pasteur* | contigs<br>=>300<br>bases | total bases<br>used in kSNP |
|---------------------|----------|----------|---------------------------|-----------------------|-------|--------|--------|------------------------------------------------------|---------------------------|-----------------------------|
| <b>BTYPP-1059-3</b> | 76M      | 66M      | 61.8186X                  | 99.99%                | 56358 | 59933  | 131519 | 88.271                                               | 121                       | 2,251,572                   |
| <b>BTYPP-1573</b>   | 117M     | 127M     | 111.748X                  | 91.36%                | 32749 | 39566  | 107446 | 99.3404                                              | 139                       | 2,304,228                   |
| <b>BTYPP-1581</b>   | 123M     | 134M     | 107.854X                  | 90.12%                | 24943 | 26391  | 74038  | 84.8855                                              | 184                       | 2,120,436                   |
| <b>BTYPP-1591</b>   | 136M     | 151M     | 90.619X                   | 90.23%                | 18235 | 21089  | 63818  | 67.2266                                              | 238                       | 2,095,676                   |
| <b>BTYPP-1662</b>   | 143M     | 158M     | 141.529X                  | 93.69%                | 20515 | 25372  | 85740  | 95.5965                                              | 197                       | 2,169,338                   |
| <b>BTYPP-1702</b>   | 118M     | 140M     | 100.717X                  | 94.43%                | 16078 | 19635  | 56514  | 89.5663                                              | 248                       | 2,179,895                   |
| <b>BTYPP-1997</b>   | 148M     | 157M     | 145.466X                  | 91.14%                | 26115 | 34529  | 106787 | 96.5543                                              | 147                       | 2,156,998                   |
| <b>BTYPP-2095</b>   | 102M     | 104M     | 89.3402X                  | 93.38%                | 18600 | 26737  | 97147  | 87.8966                                              | 219                       | 2,182,920                   |
| <b>BTYPP-2100</b>   | 122M     | 138M     | 113.963X                  | 92.50%                | 33071 | 42238  | 119052 | 99.3646                                              | 156                       | 2,388,462                   |
| <b>BTYPP-2192</b>   | 90M      | 97M      | 77.8634X                  | 91.20%                | 19255 | 23073  | 80242  | 91.1344                                              | 226                       | 2,145,356                   |
| <b>BTYPP-2225</b>   | 141M     | 156M     | 112.826X                  | 92.38%                | 27679 | 34885  | 88278  | 81.7845                                              | 176                       | 2,222,699                   |
| <b>BTYPP-2237</b>   | 138M     | 150M     | 130.836X                  | 93.01%                | 23741 | 32575  | 88507  | 98.9784                                              | 206                       | 2,303,371                   |
| <b>BTYPP-2723</b>   | 134M     | 153M     | 120.962X                  | 93.65%                | 18339 | 26426  | 86933  | 90.8173                                              | 208                       | 2,178,579                   |
| <b>BTYPP-903</b>    | 153M     | 163M     | 149.556X                  | 92.86%                | 79539 | 76267  | 176061 | 99.3453                                              | 102                       | 2,331,060                   |
| <b>BTYPP1059-1</b>  | 139M     | 152M     | 138.553X                  | 99.97%                | 31985 | 36504  | 91536  | 91.5566                                              | 145                       | 2,236,758                   |
| <b>BTYPP1059-2</b>  | 98M      | 107M     | 65.6635X                  | 99.92%                | 18883 | 22277  | 59296  | 75.4169                                              | 262                       | 2,209,401                   |
| <b>BTYPX-73</b>     | 214M     | 242M     | 149.284X                  | 92.00%                | 79532 | 92078  | 202881 | 77.6239                                              | 55                        | 2,222,837                   |
